# Supplementary material
Source: PubMed Central journal article supplement (PMC10424255)

MSMuTect

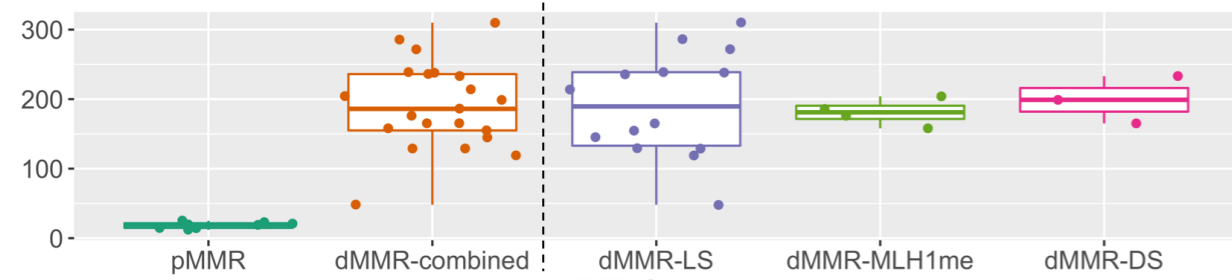

MMR Subtype

TMB

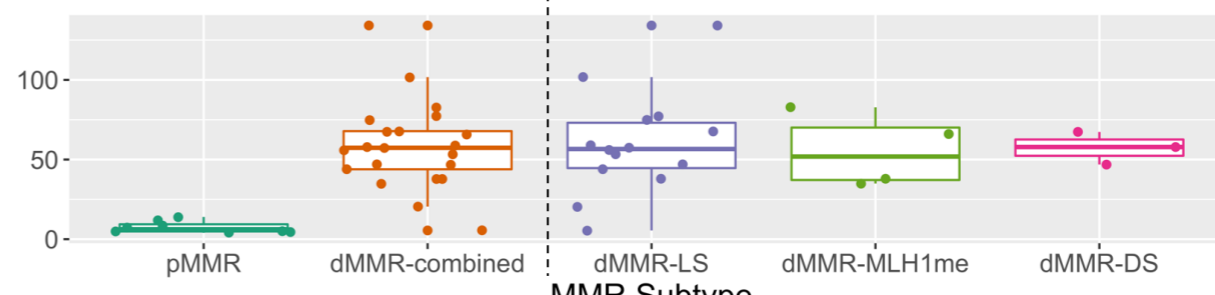

MMR Subtype

MANTIS

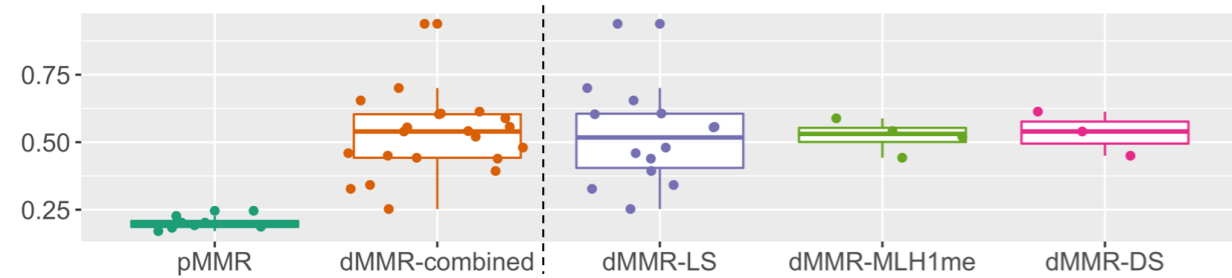

MMR Subtype

TMS ID2+ID7

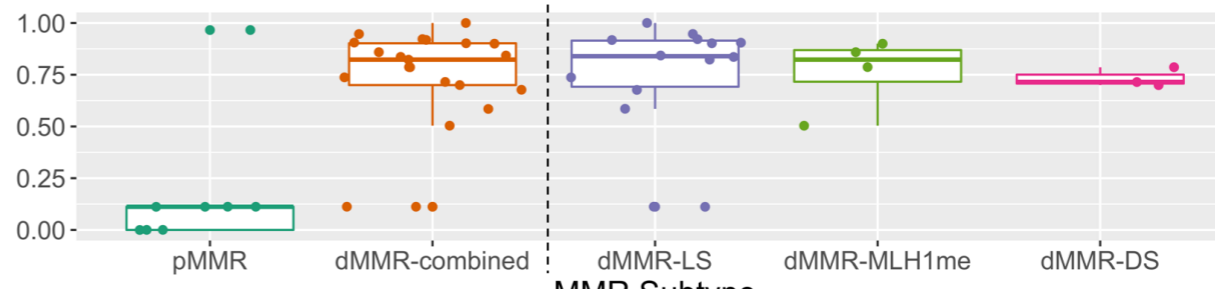

MMR Subtype

MSISensor

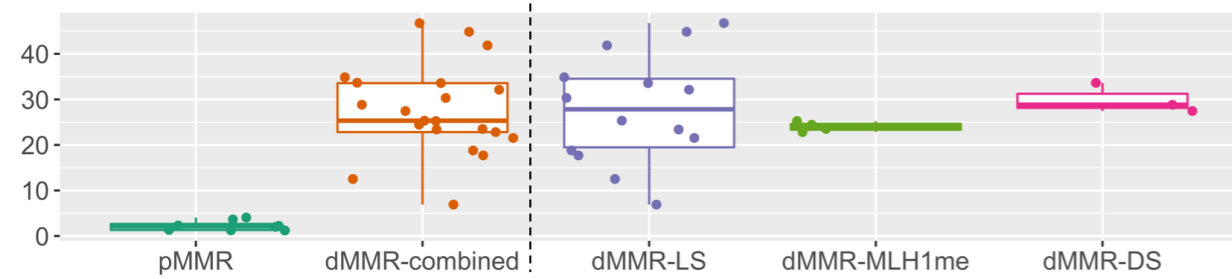

MMR Subtype

TMS SBS15

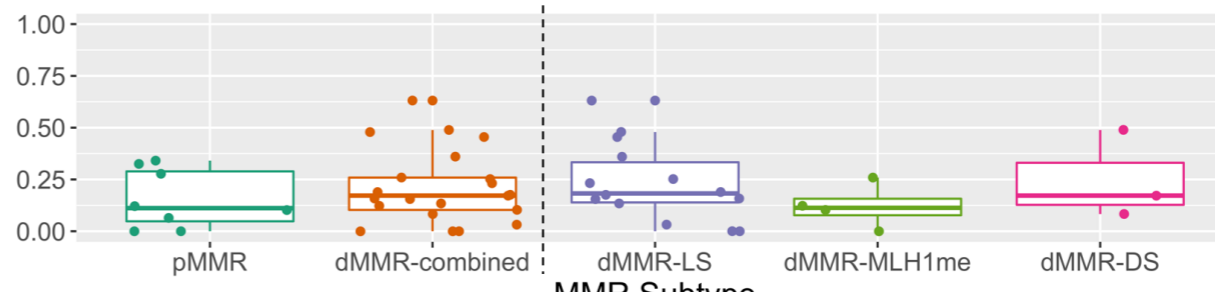

MMR Subtype

MSIseq

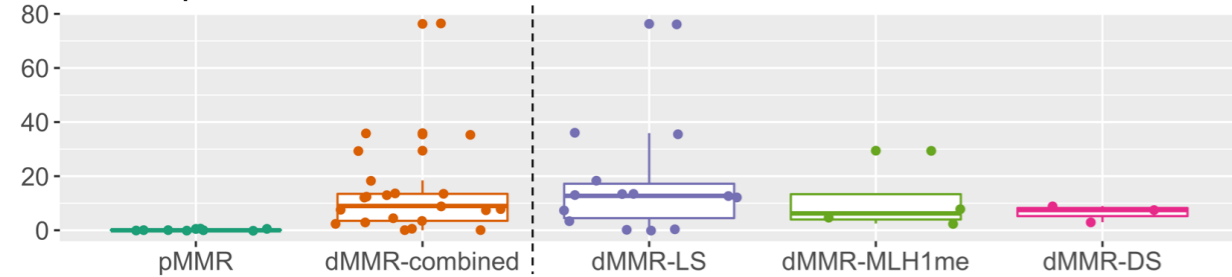

MMR Subtype

TMS SBS20

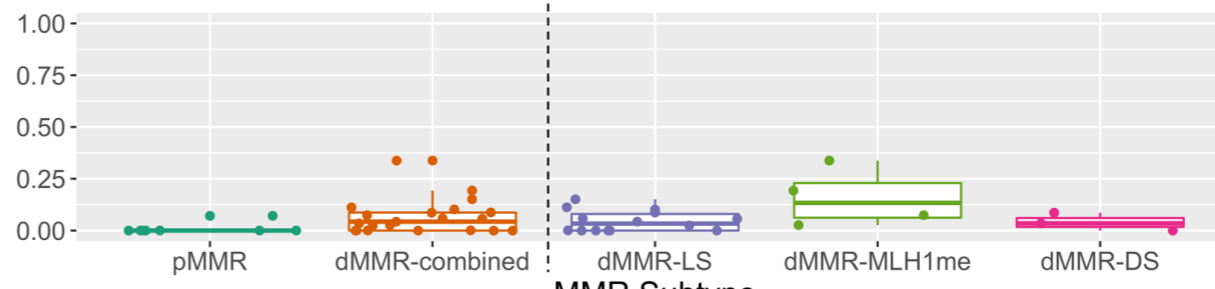

MMR Subtype

INDEL Count

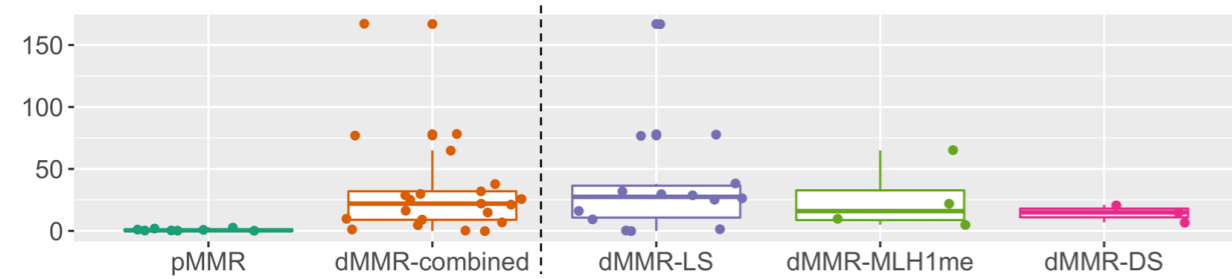

MMR Subtype

TMS SBS54

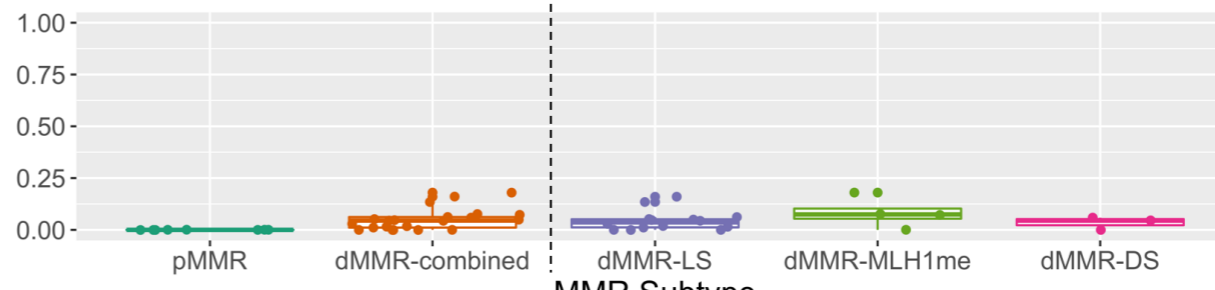

MMR Subtype

Subtype

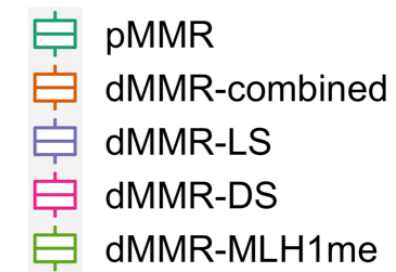

Supplement: mmc2.pdf [file mmc2.pdf]
