# Supplementary material
Source: PubMed Central journal article supplement (PMC10424255)

**MSMuTect**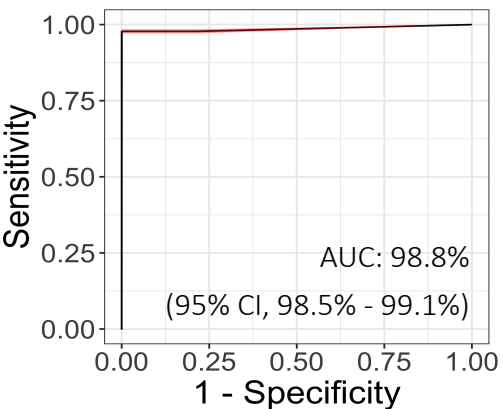**MANTIS**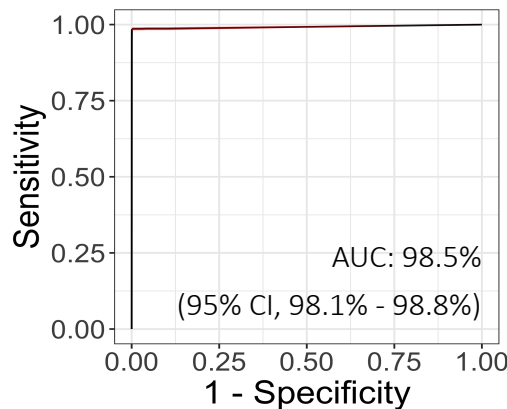**MSISensor**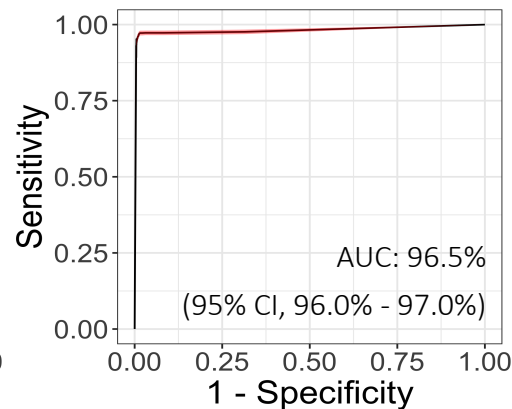**MSIseq**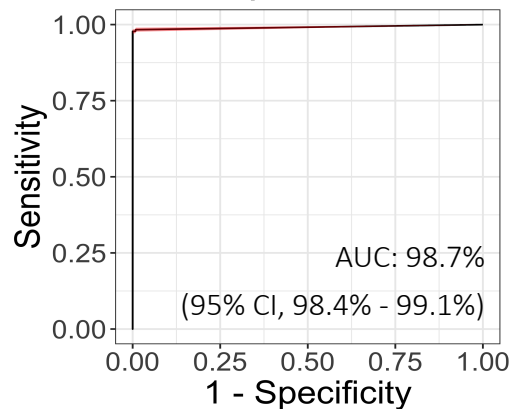**TMB**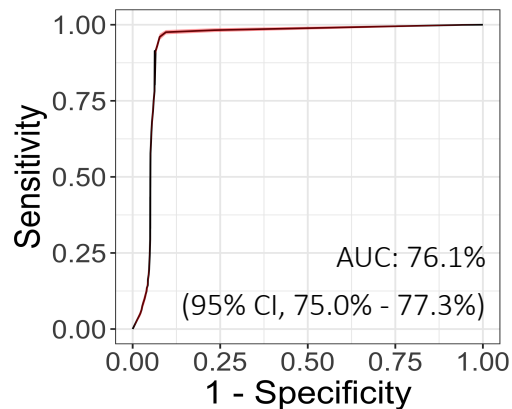**INDEL Count**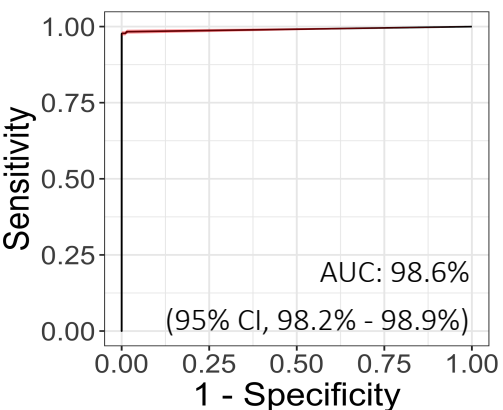**TMS ID2+ID7**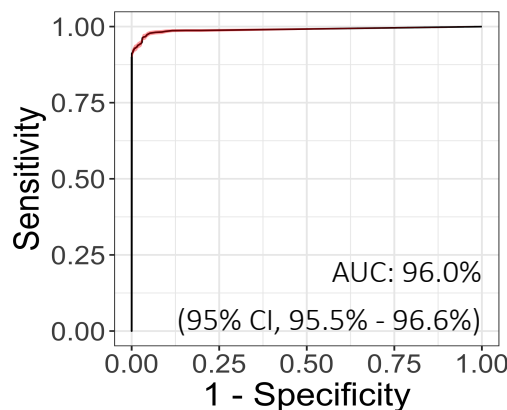**TMS SBS15**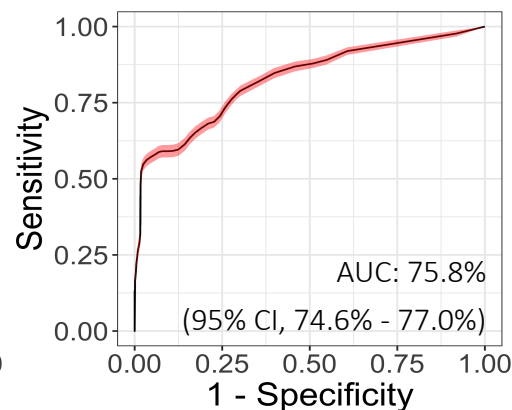**TMS SBS20**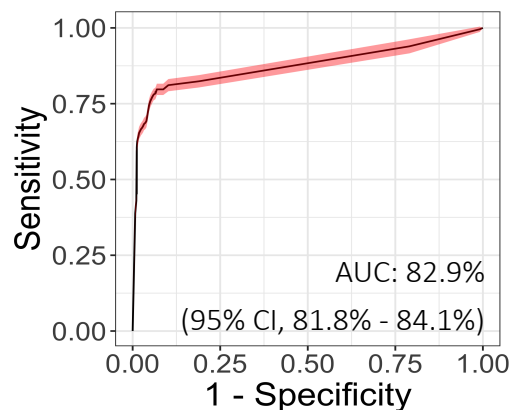**TMS SBS54**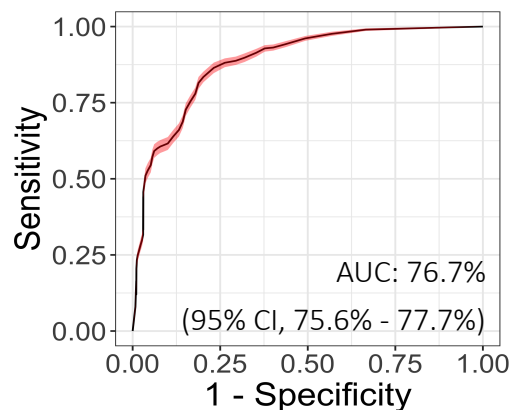

Supplement: mmc1.pdf [file mmc1.pdf]

# Feature Counting by MMR Status for Panel Sequenced SSTs

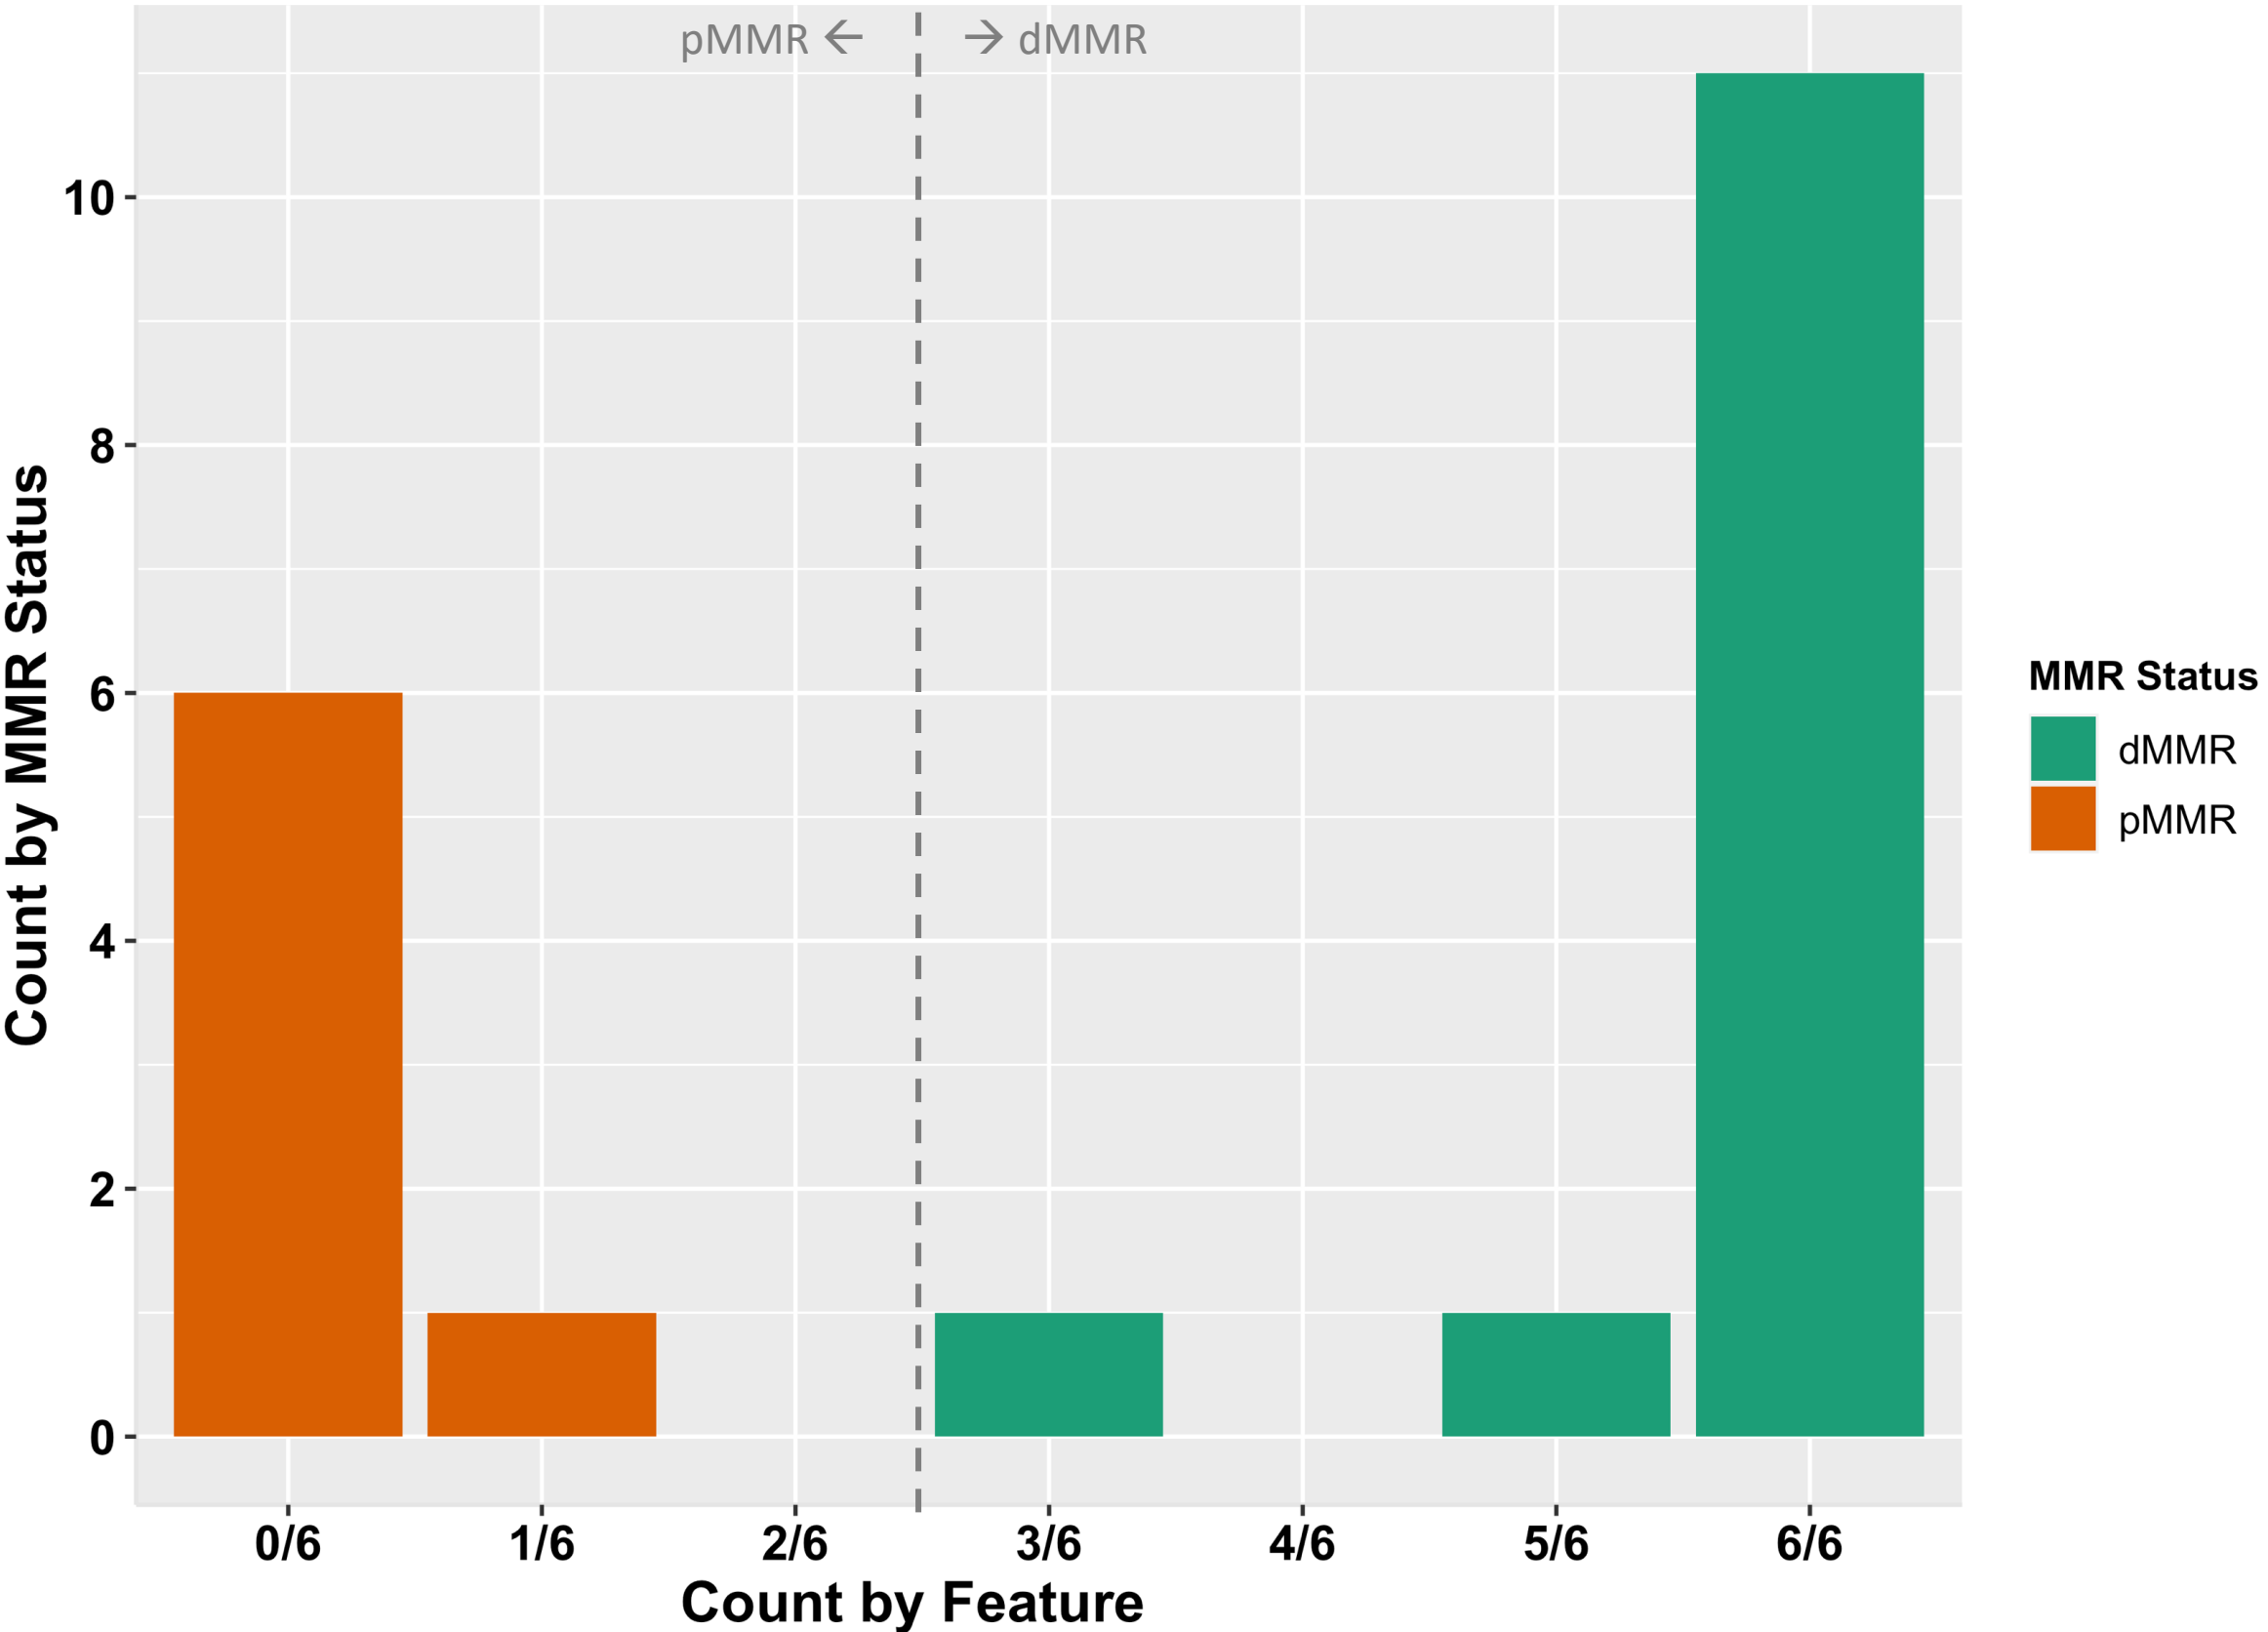

Supplement: mmc10.pdf [file mmc10.pdf]

**MSMuTect**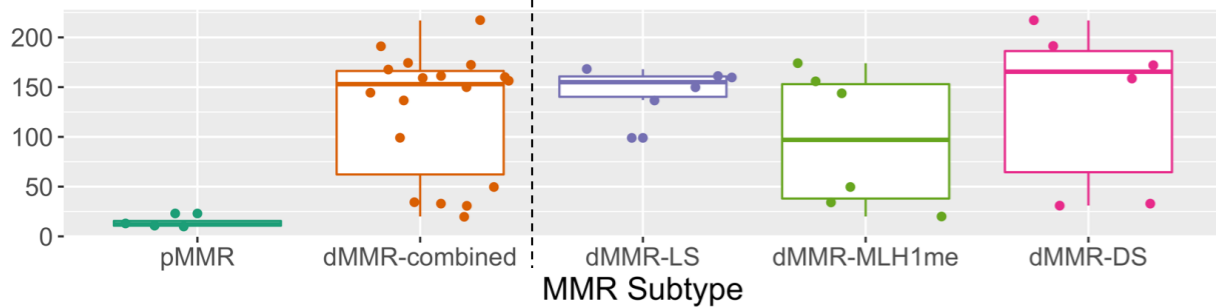**TMB**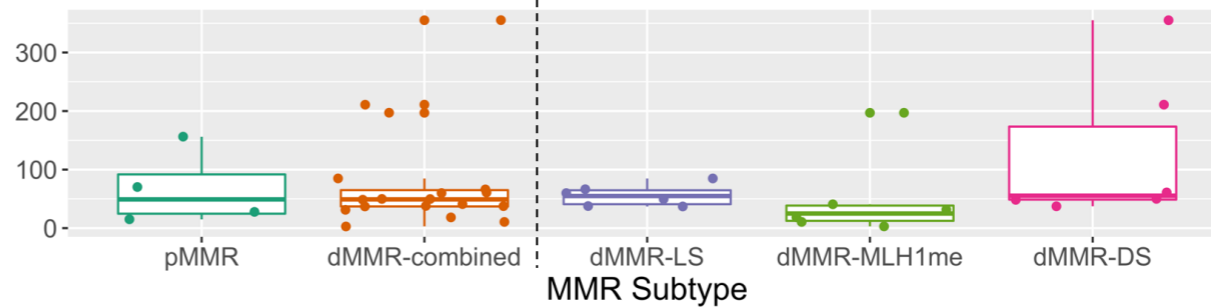**MANTIS**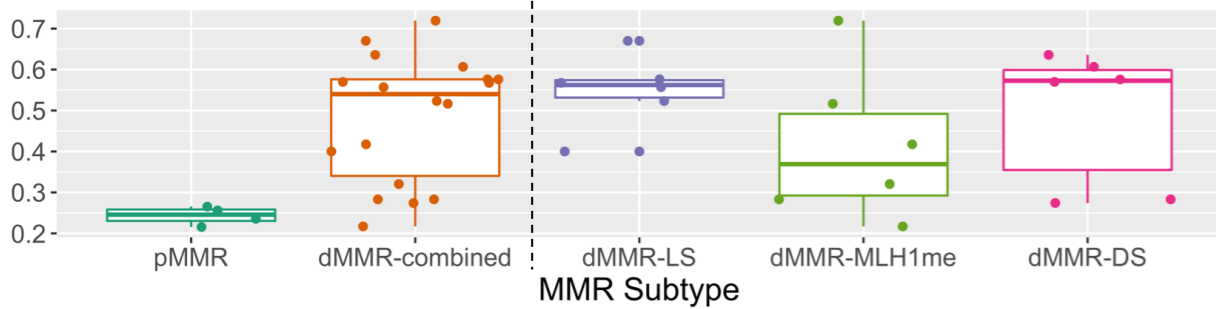**TMS ID2+ID7**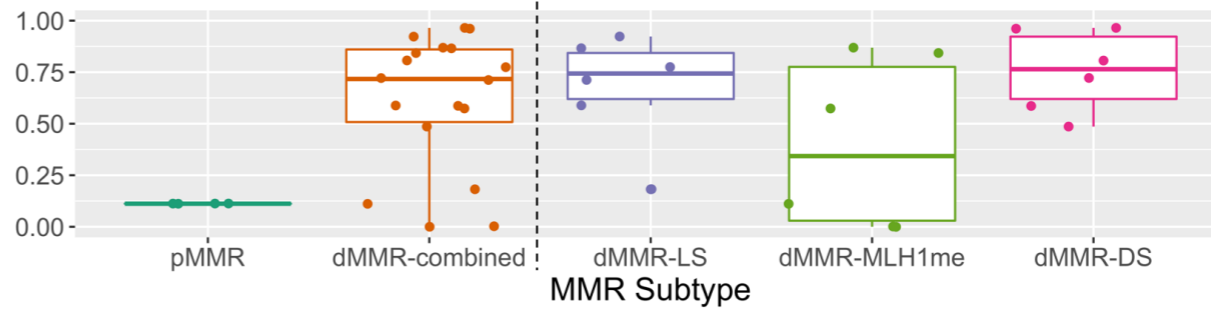**MSISensor**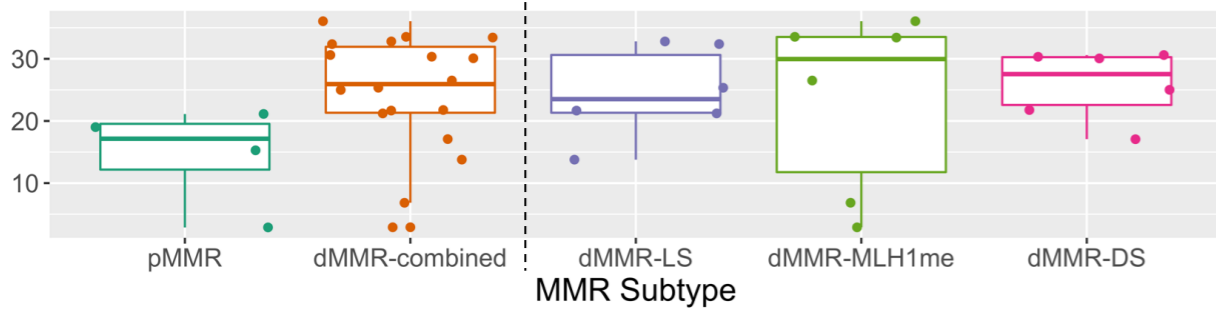**TMS SBS15**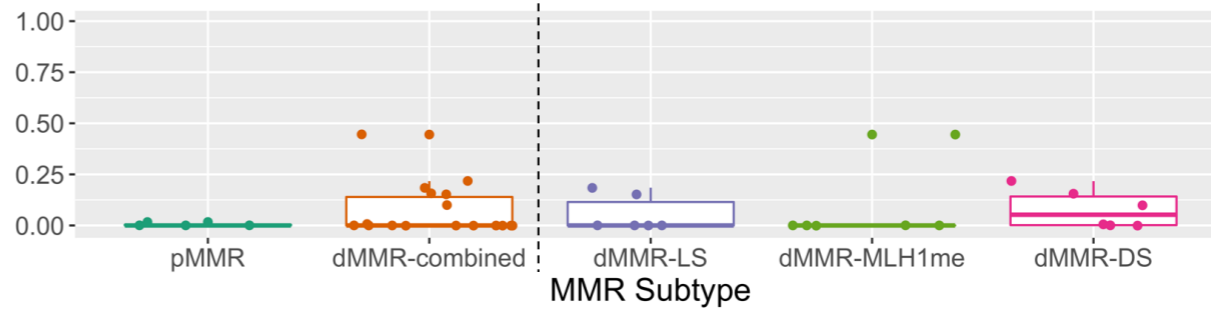**MSIseq**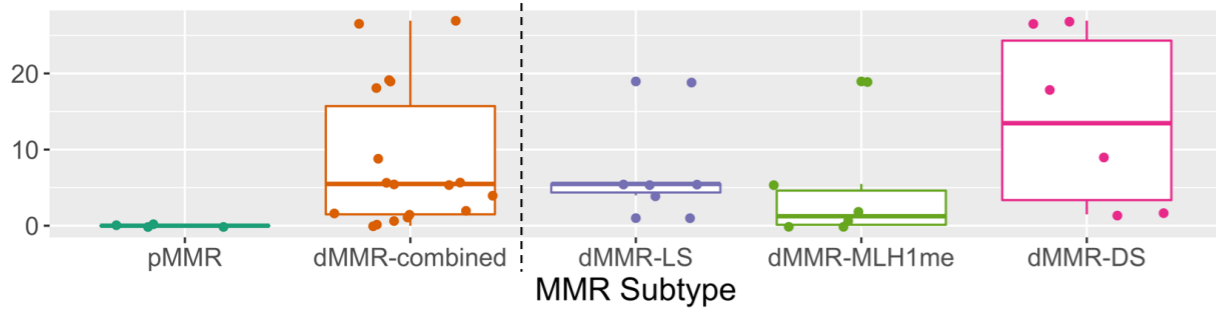**TMS SBS20**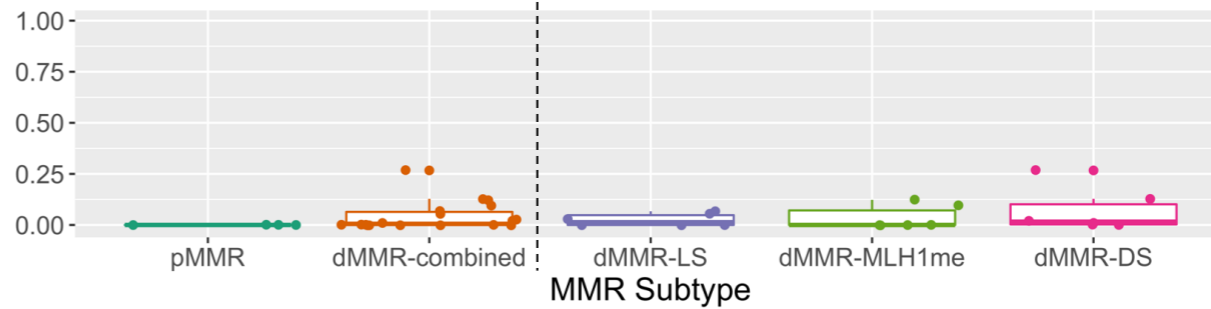**INDEL Count**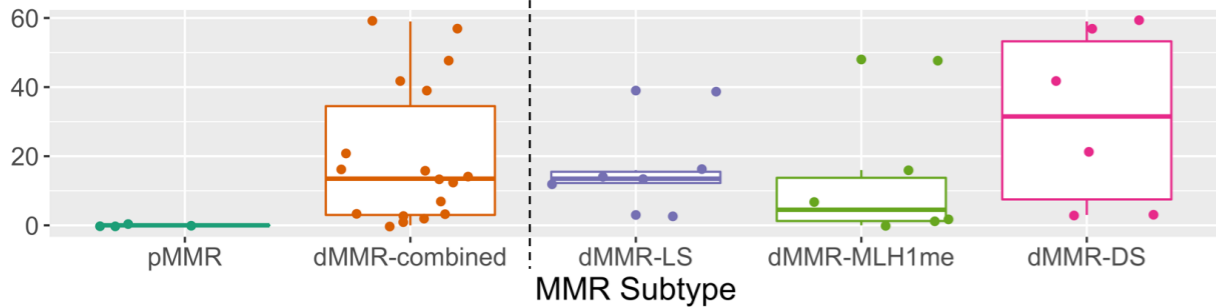**TMS SBS54**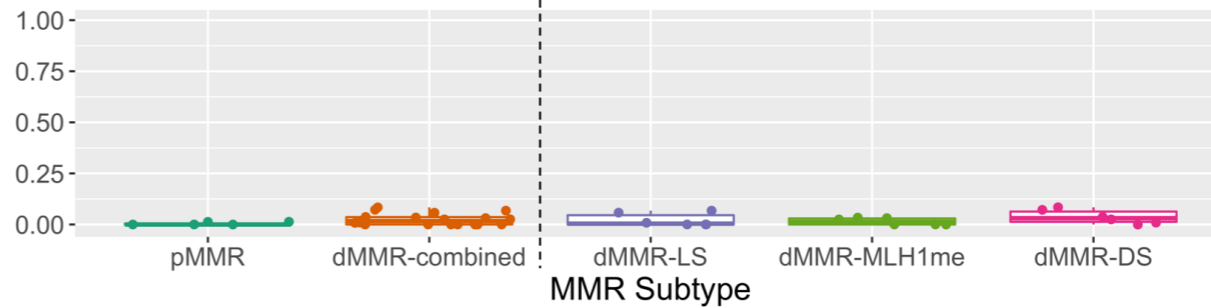**Subtype**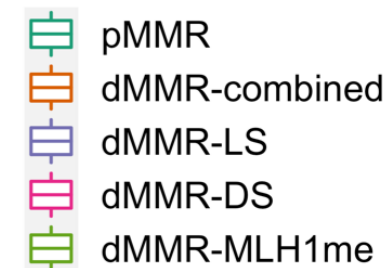

Supplement: mmc3.pdf [file mmc3.pdf]

MSMuTect

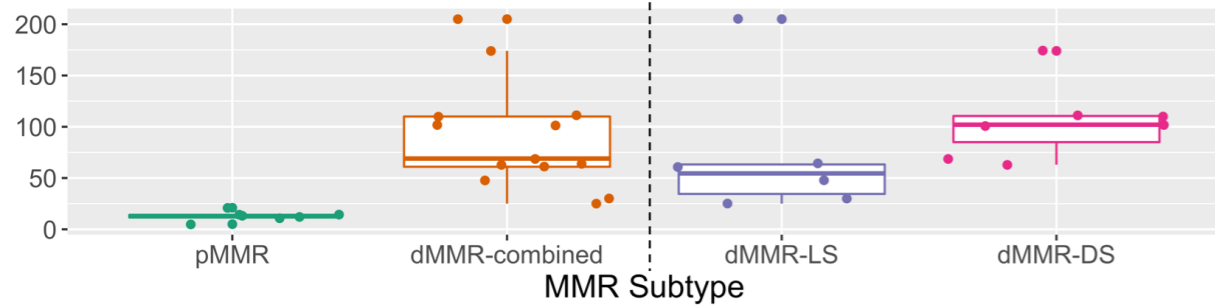

TMB

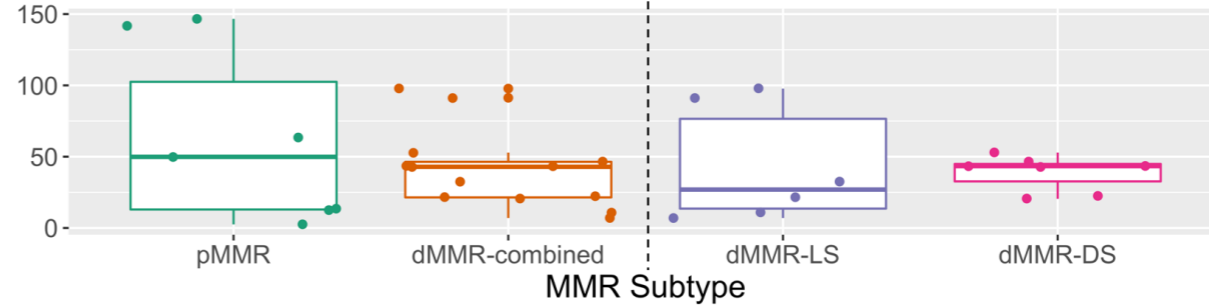

MANTIS

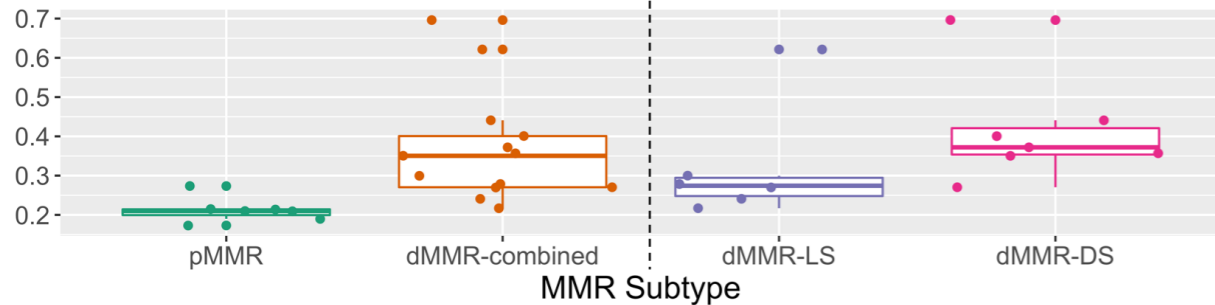

TMS ID2+ID7

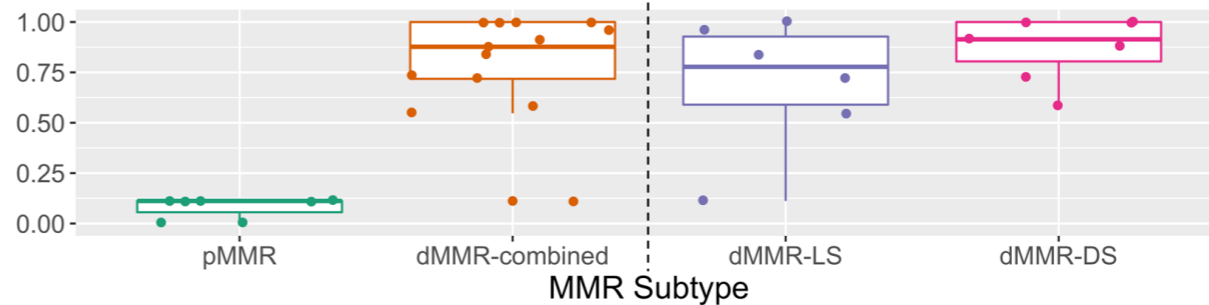

MSISensor

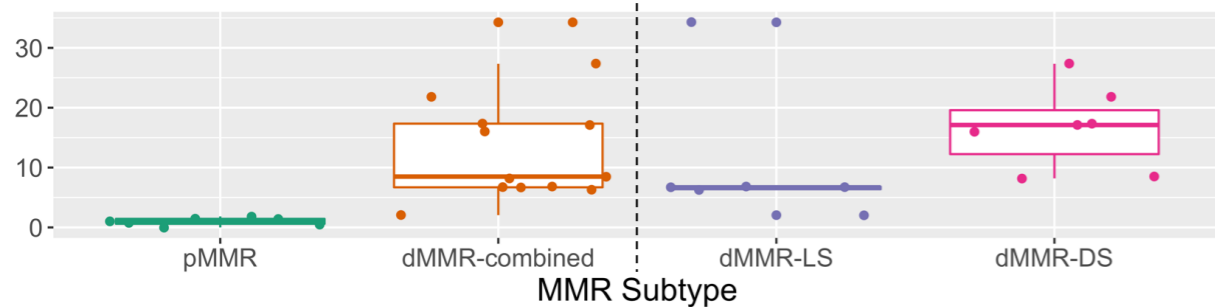

TMS SBS15

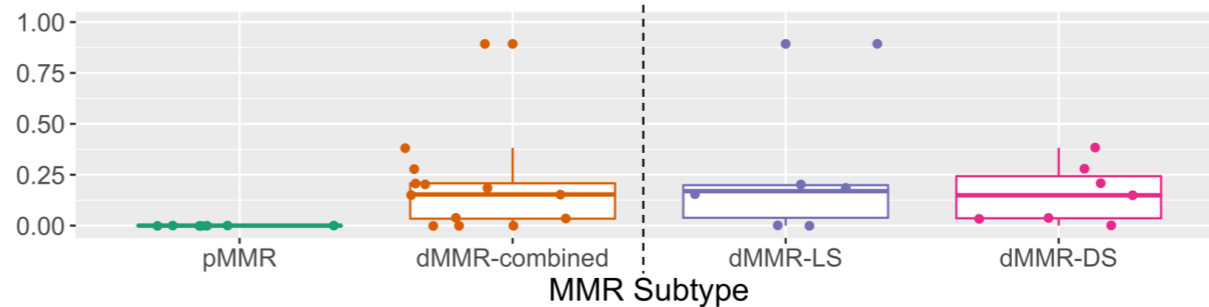

MSIseq

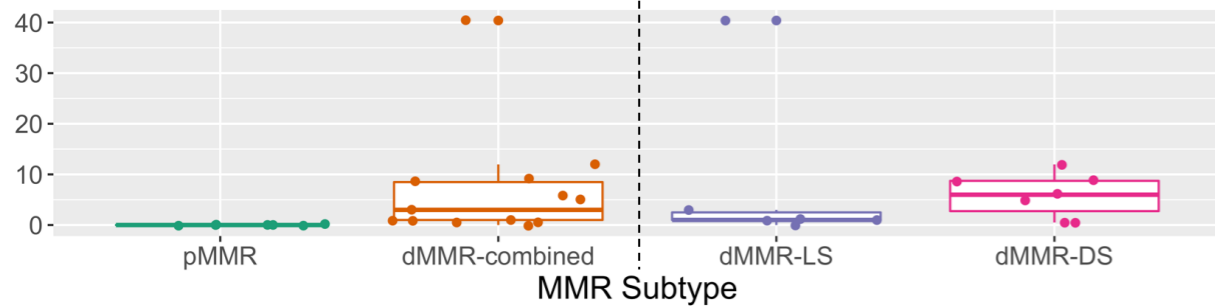

TMS SBS20

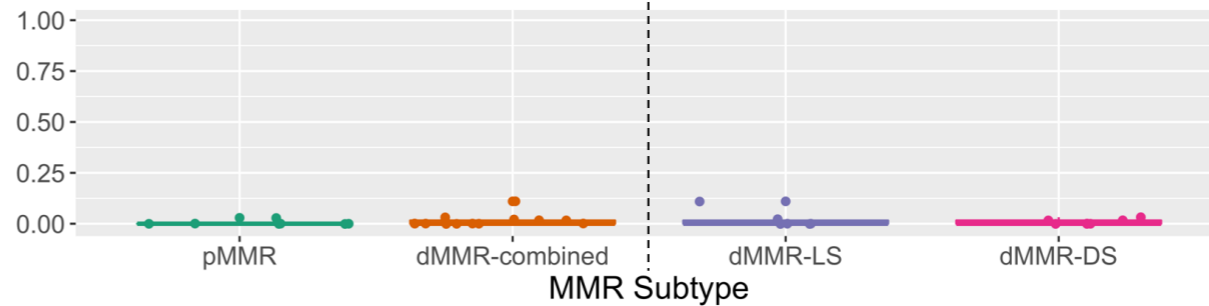

INDEL Count

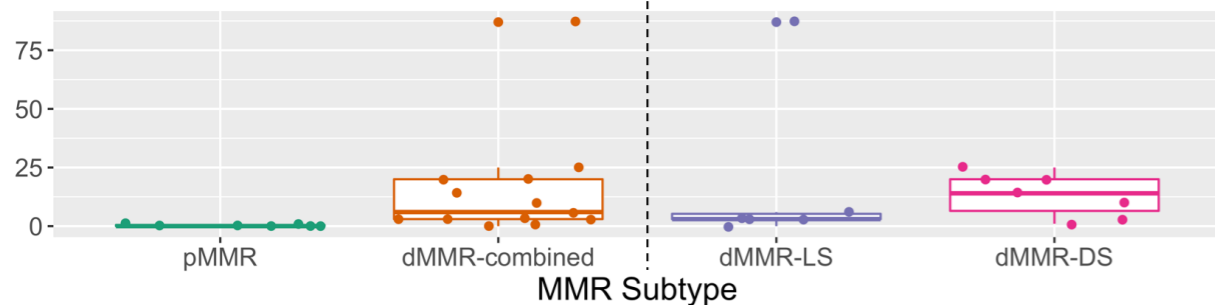

TMS SBS54

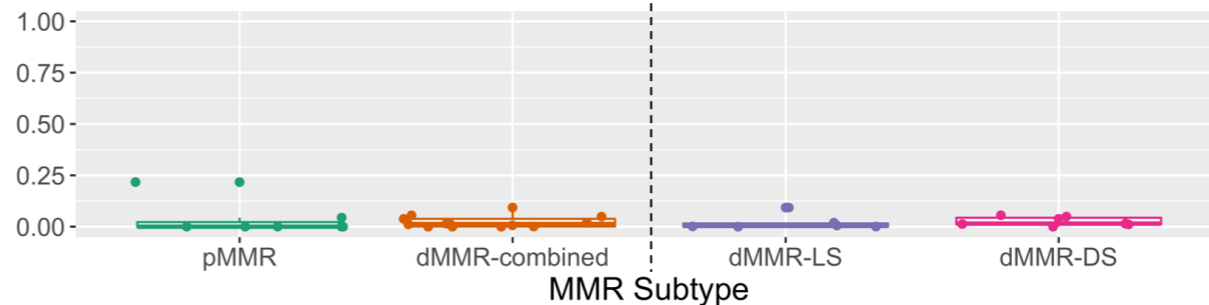

Subtype

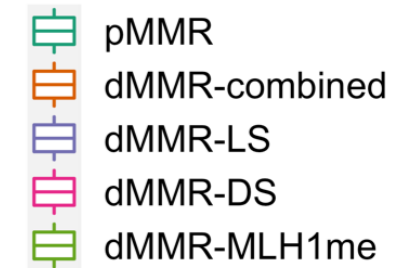

Supplement: mmc4.pdf [file mmc4.pdf]

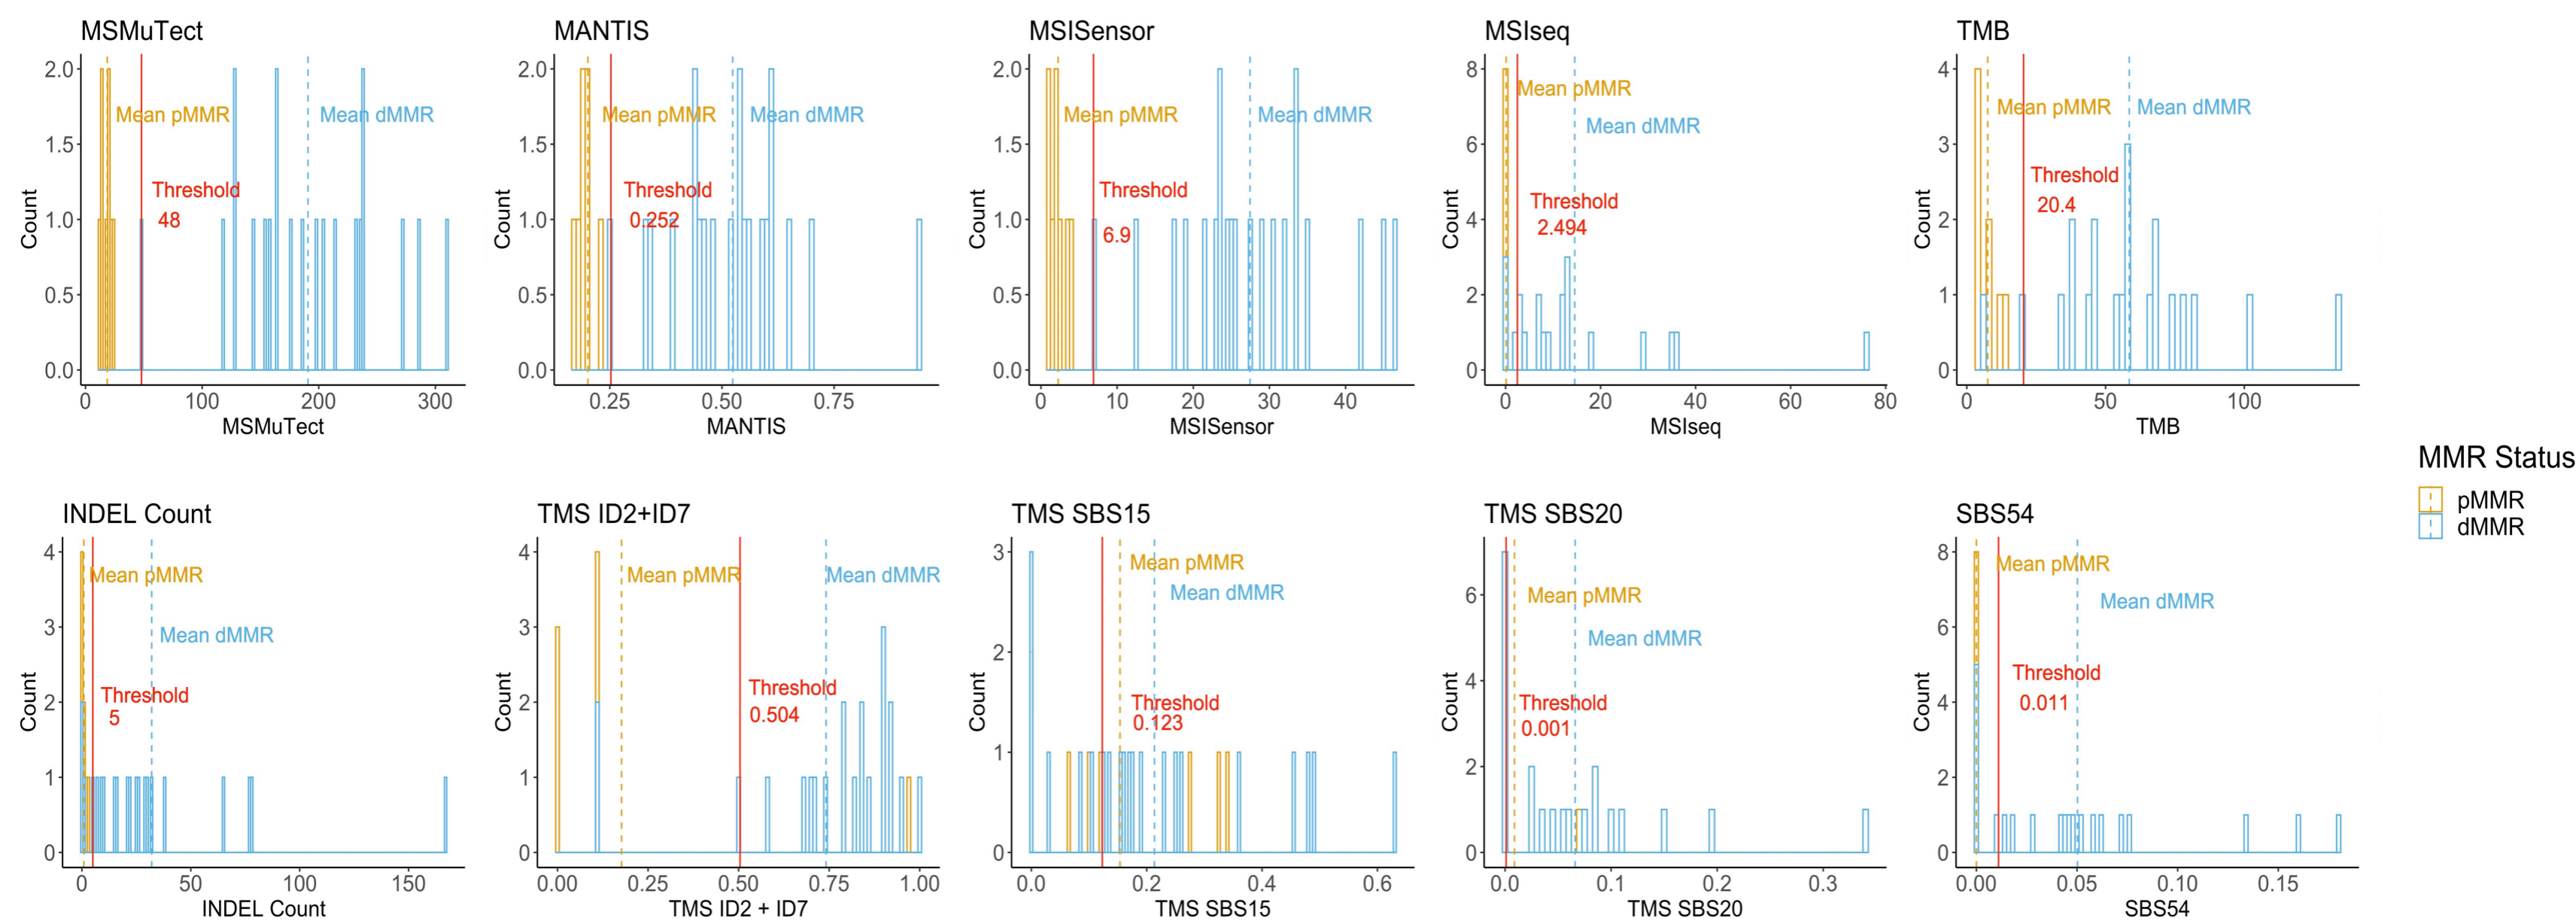

Supplement: mmc5.pdf [file mmc5.pdf]

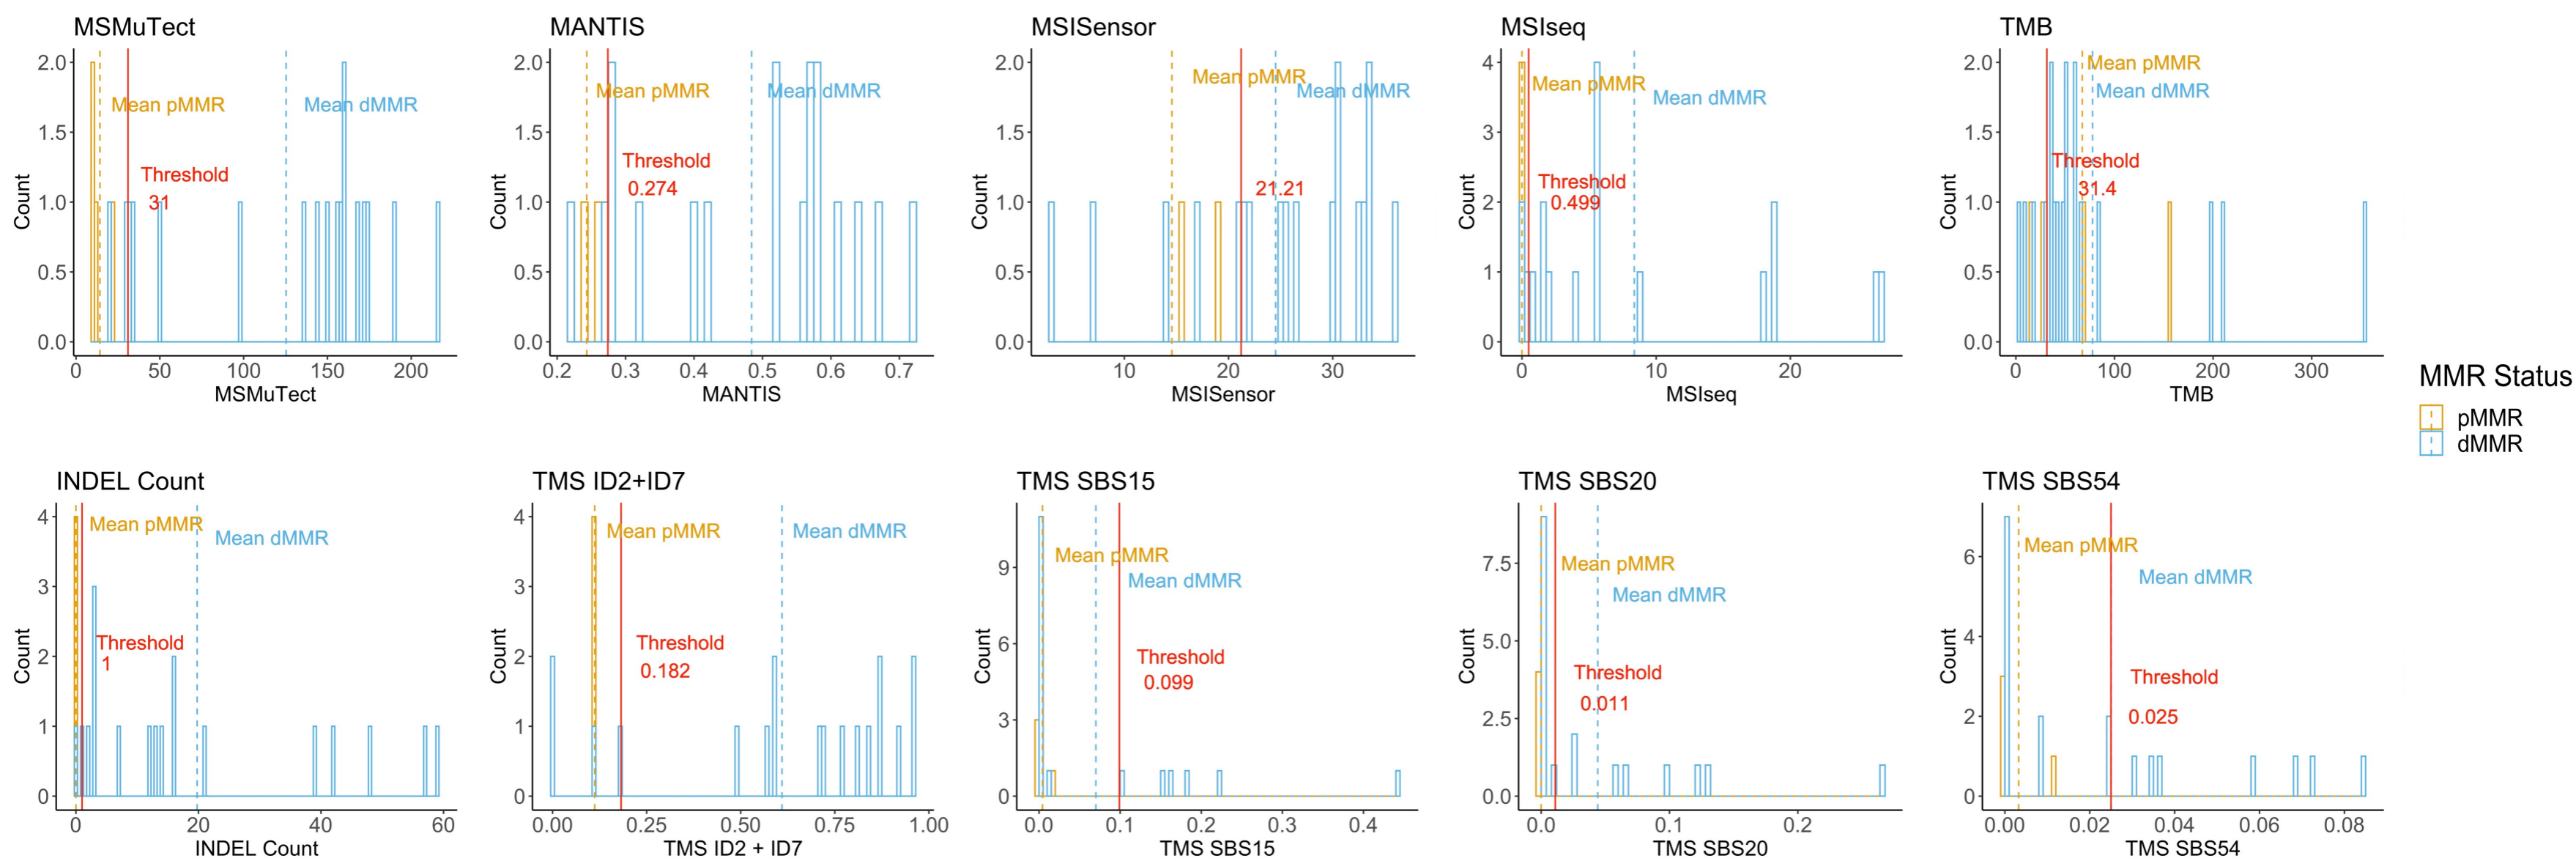

Supplement: mmc6.pdf [file mmc6.pdf]

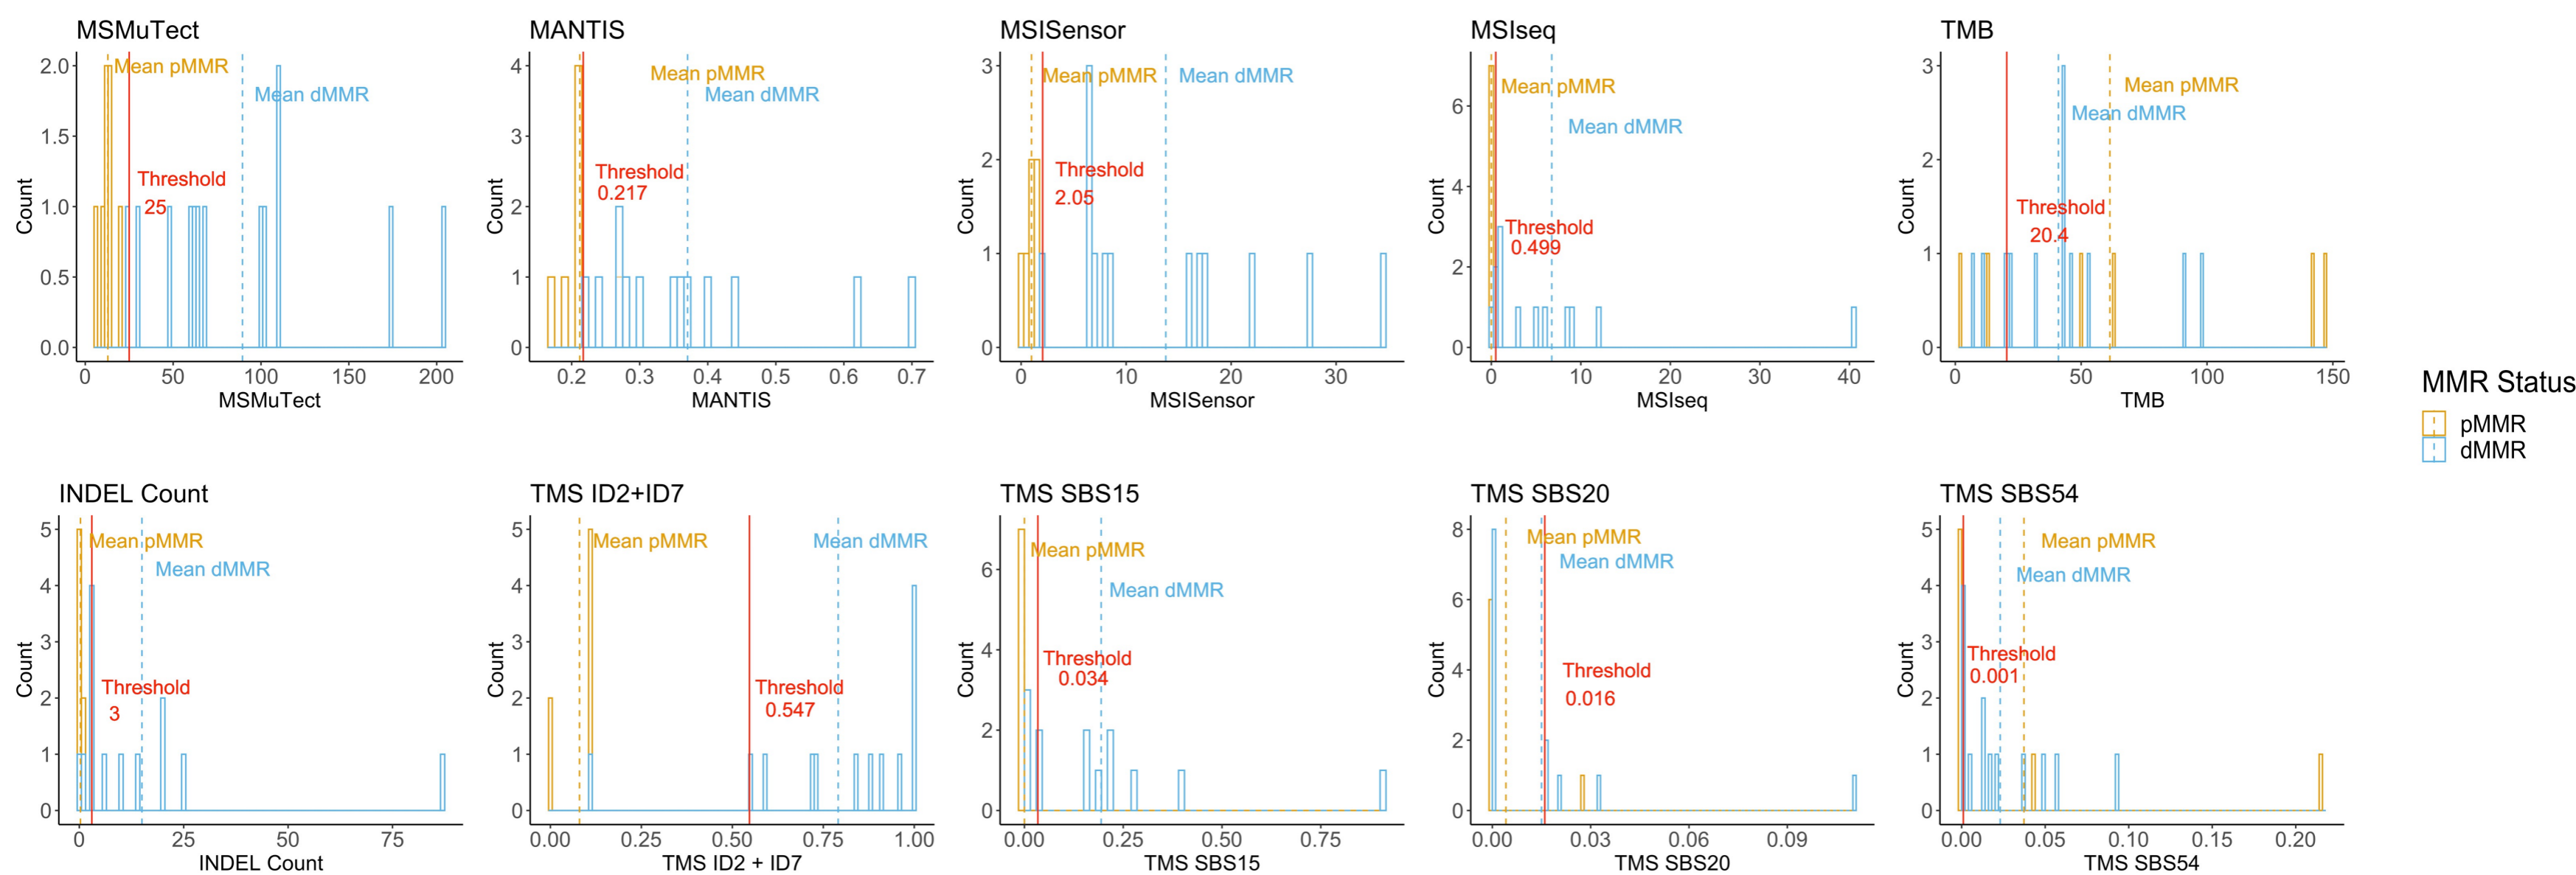

Supplement: mmc7.pdf [file mmc7.pdf]

# Feature Counting by MMR Status for Panel Sequenced CRCs

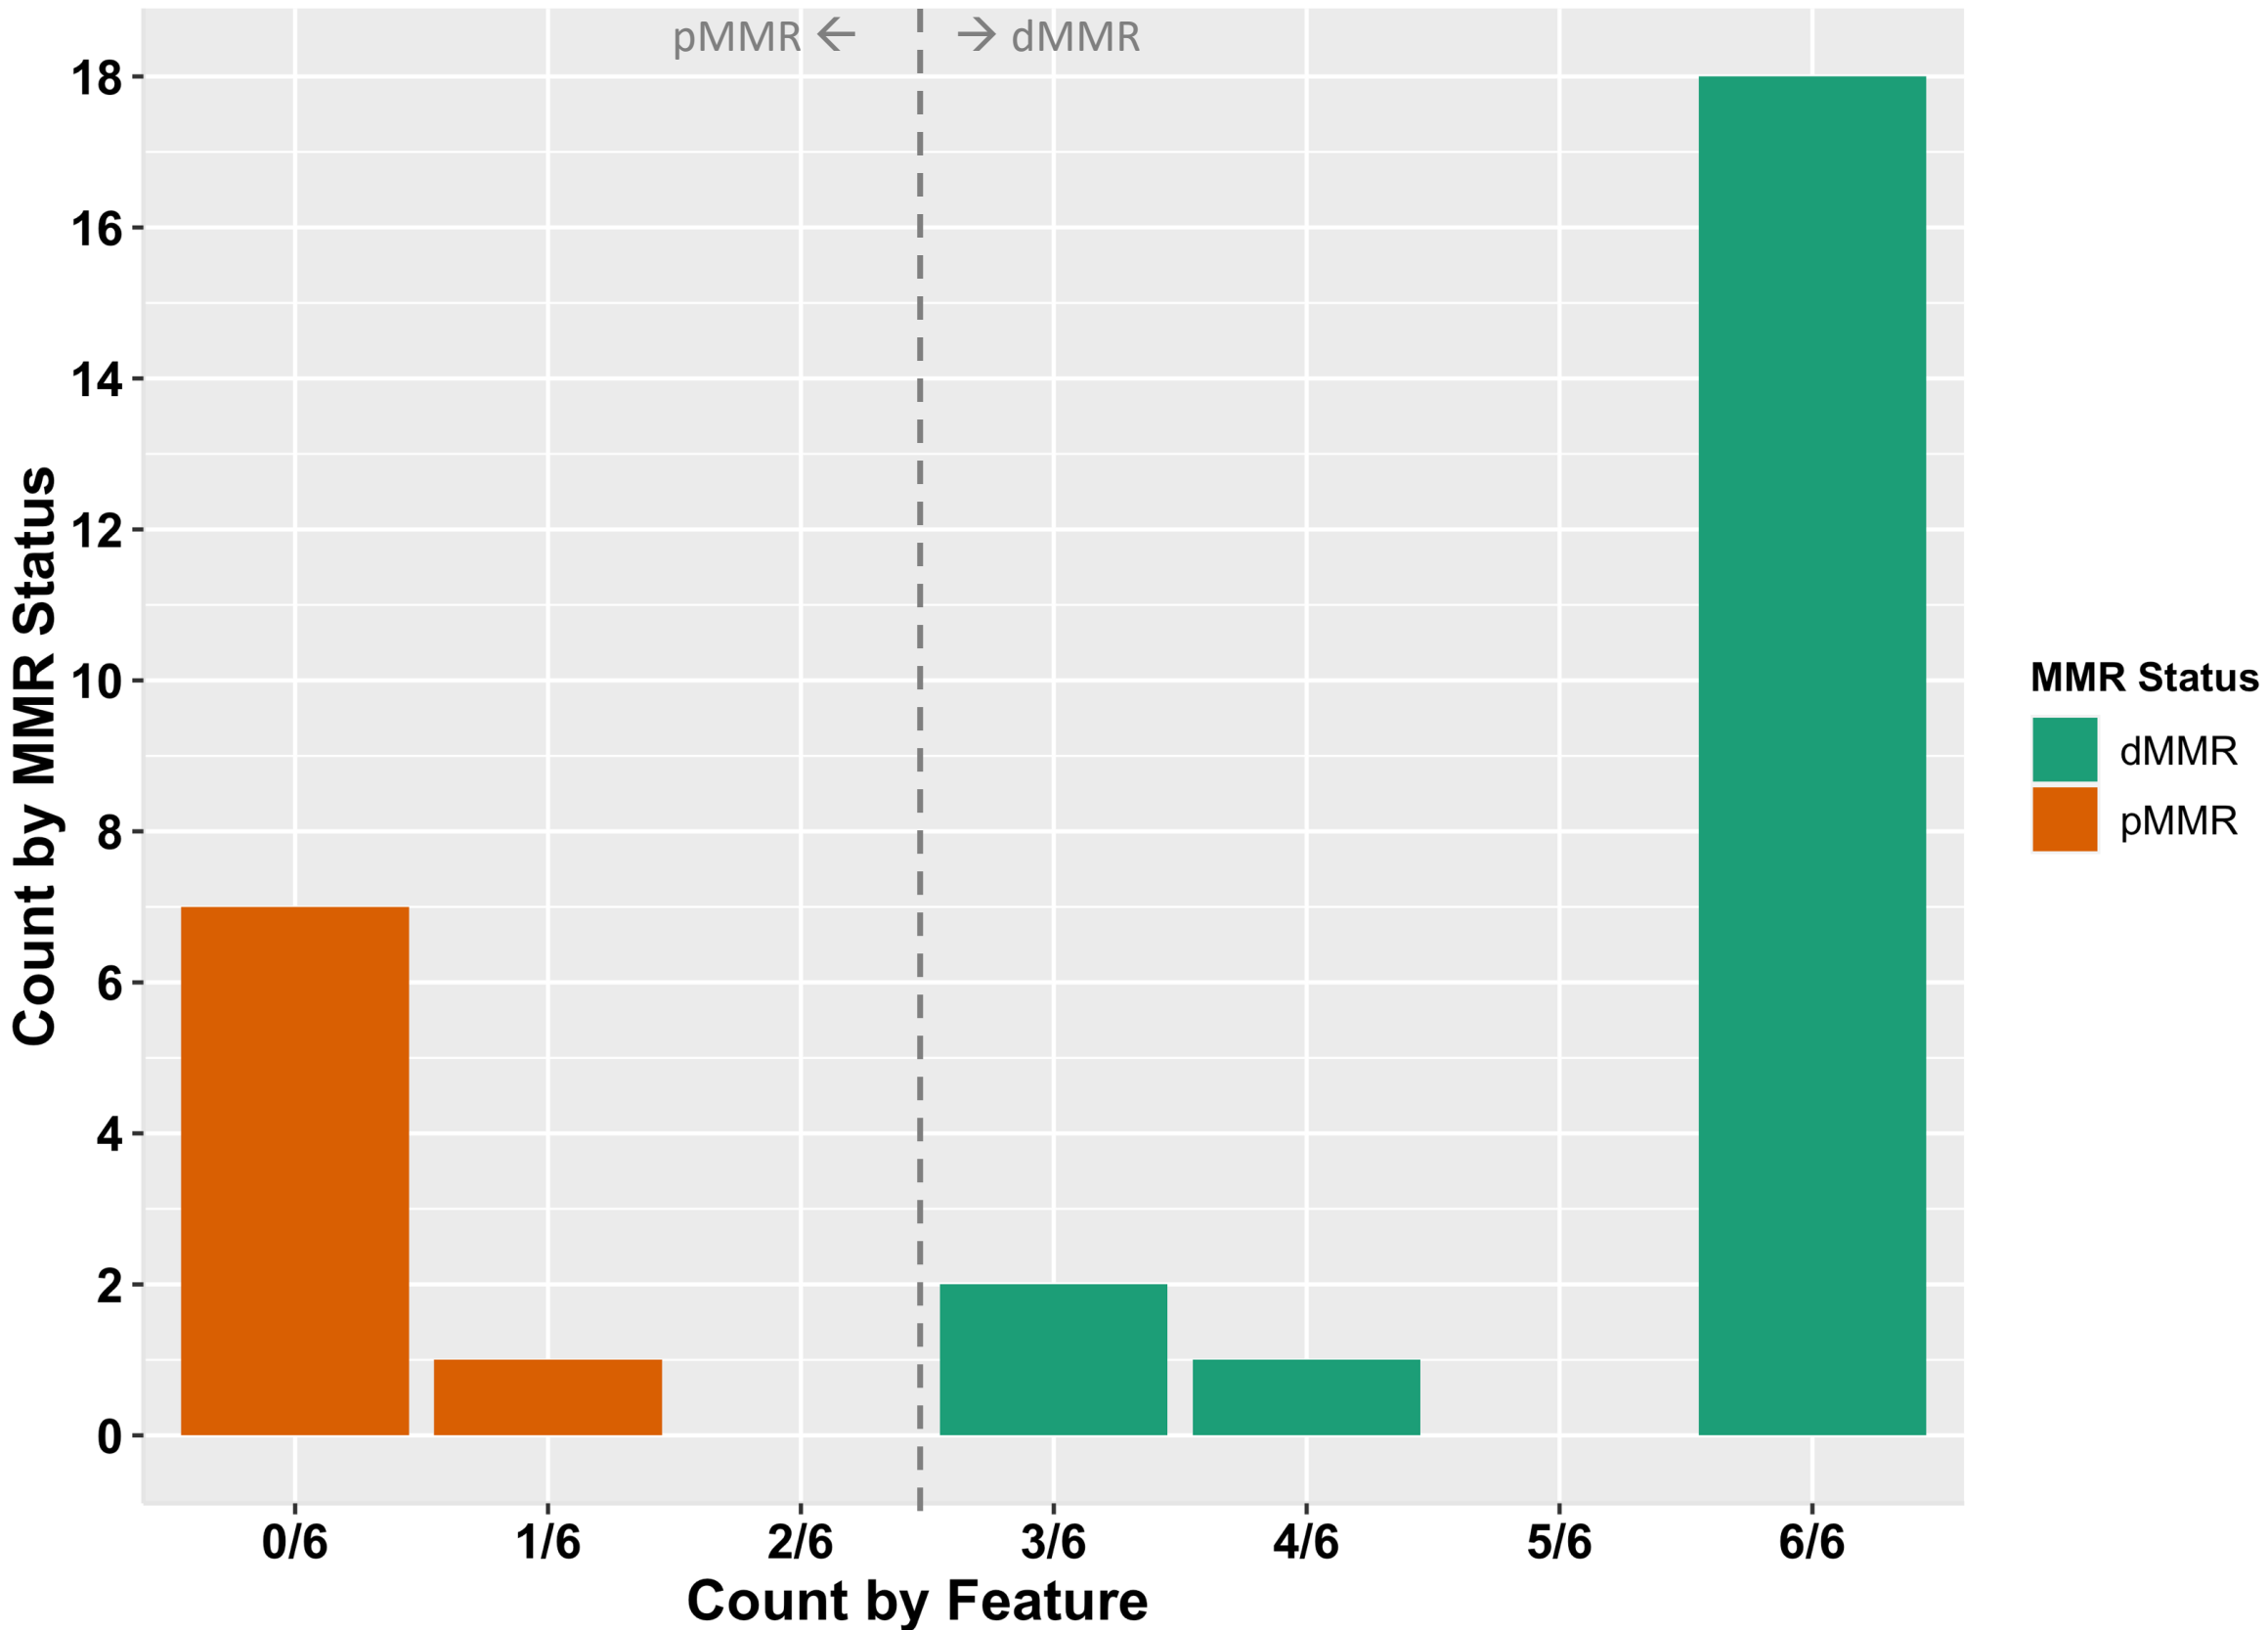

Supplement: mmc8.pdf [file mmc8.pdf]

# Feature Counting by MMR Status for Panel Sequenced ECs

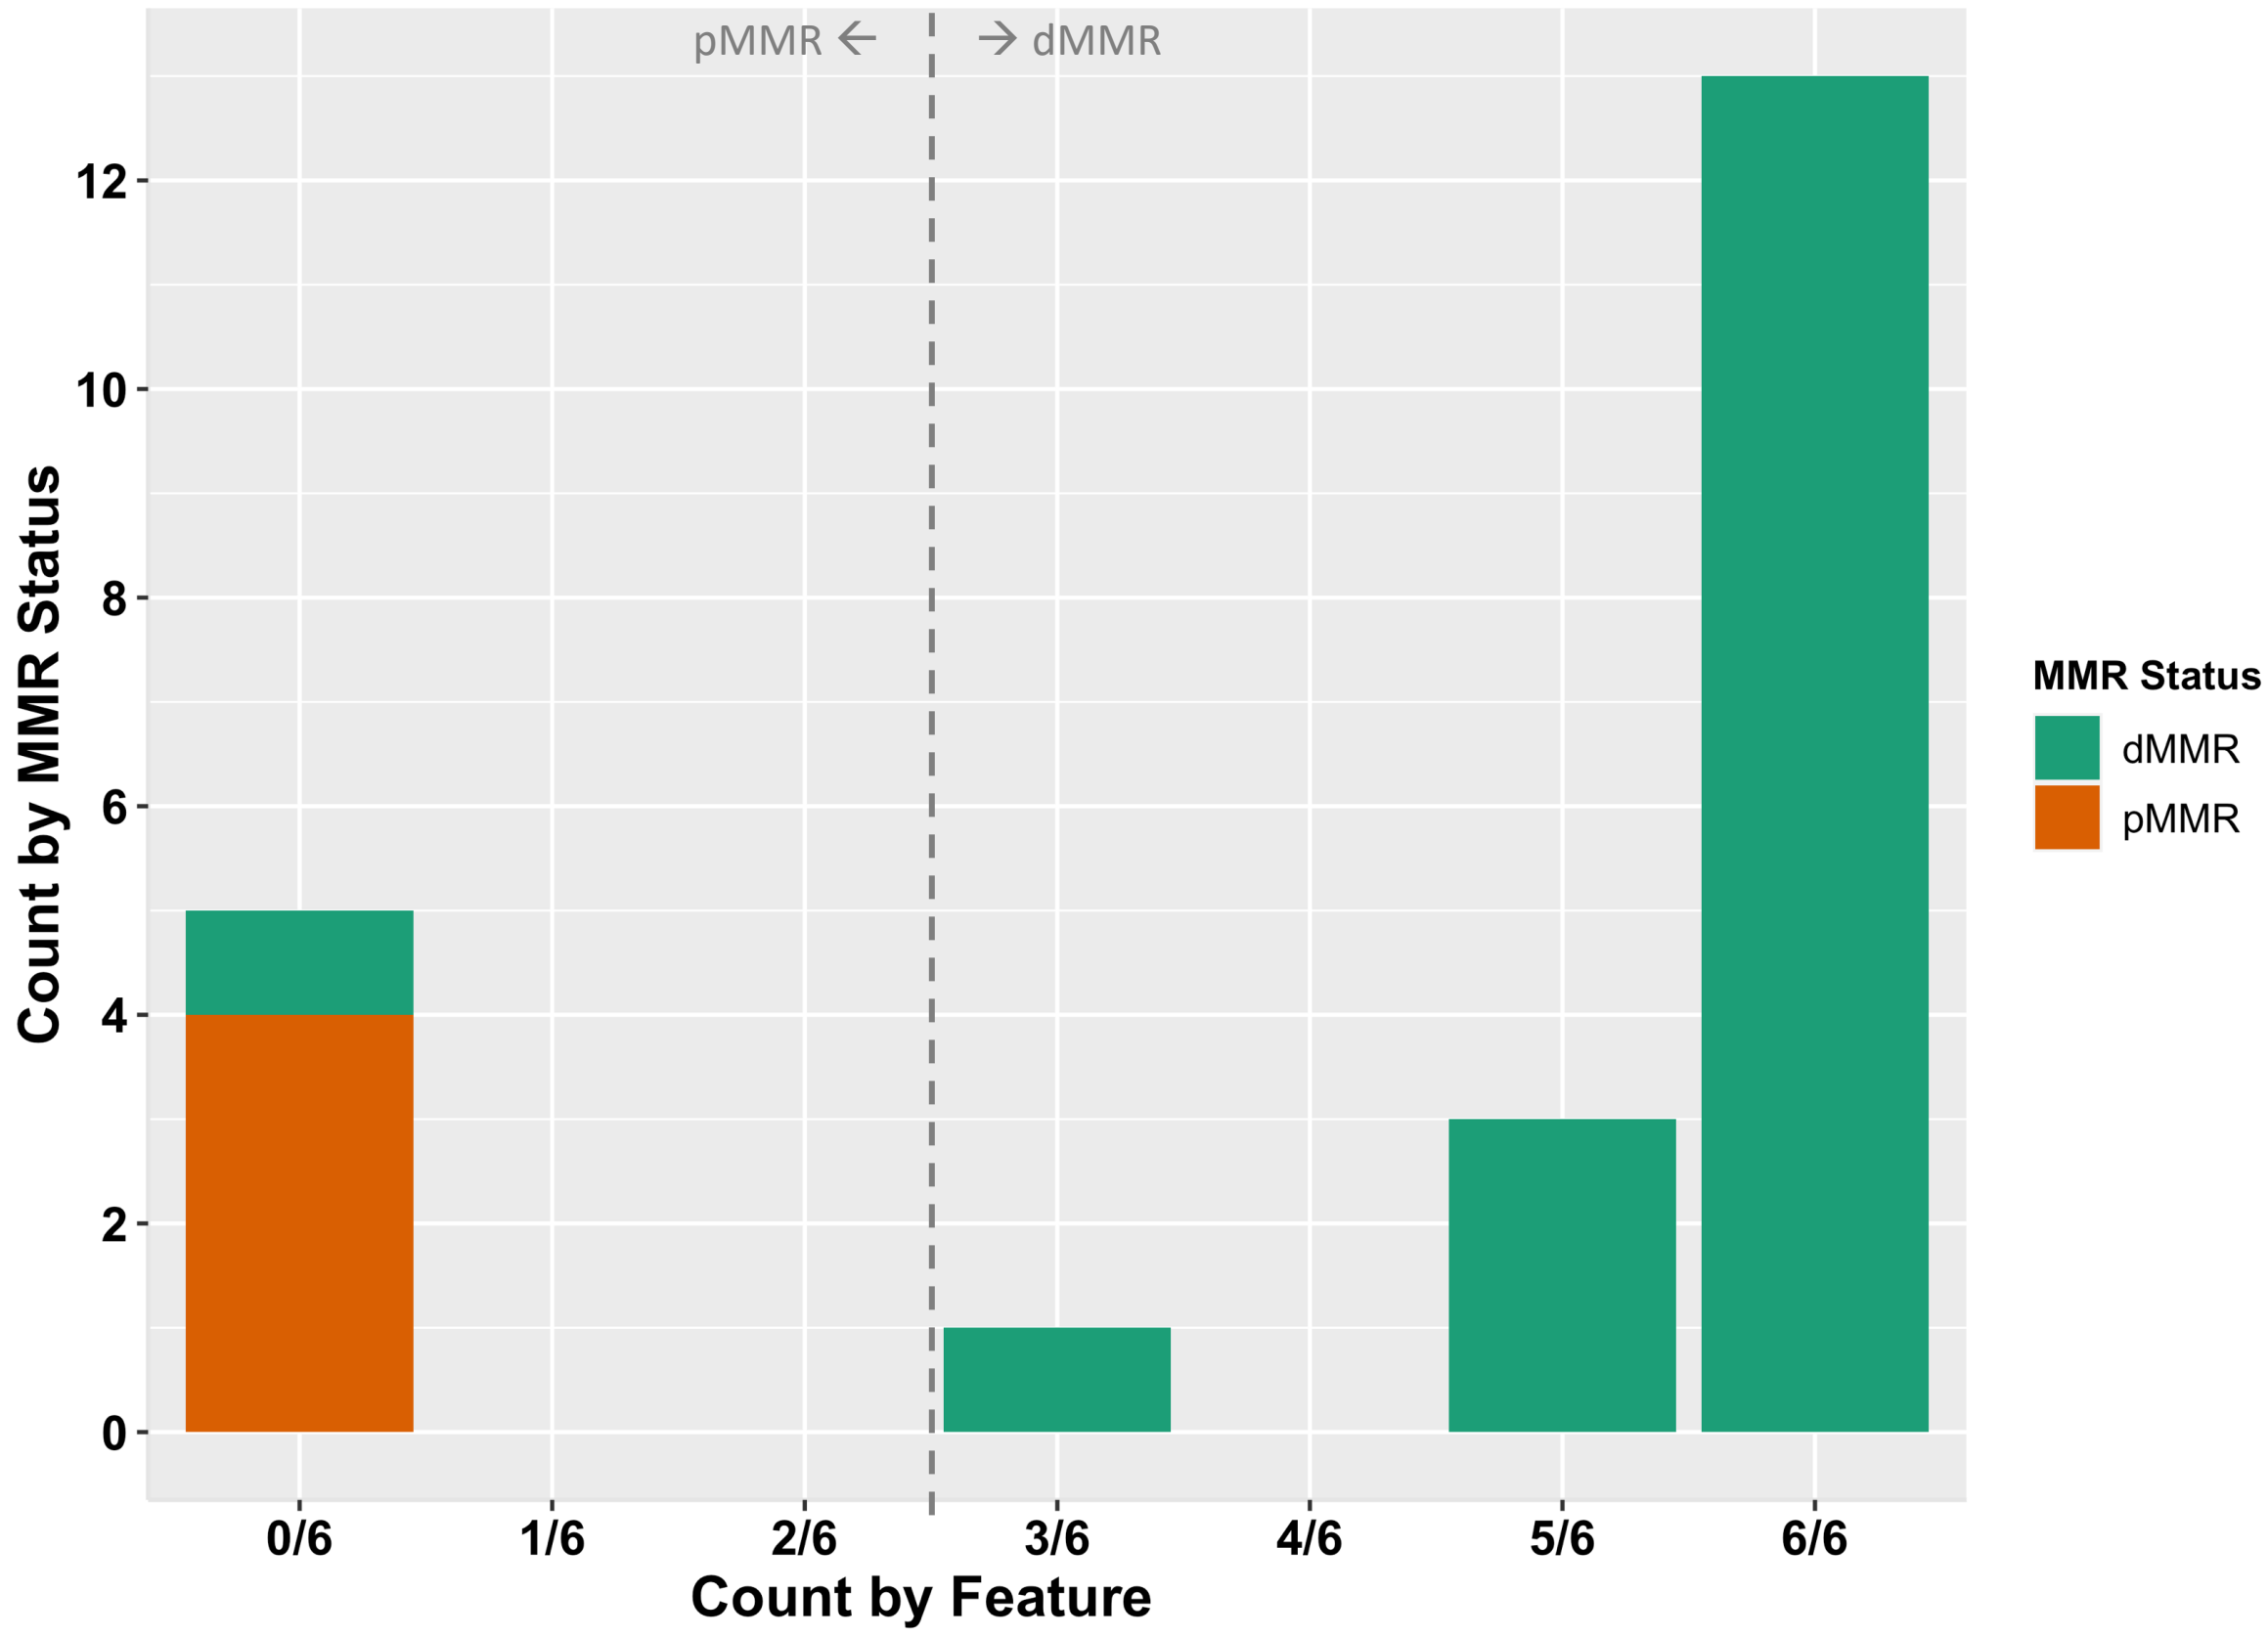

Supplement: mmc9.pdf [file mmc9.pdf]
